# Supplementary material for: A low-cost and open-source approach for supraglacial debris thickness mapping using UAV-based infrared thermography
Source: Copernicus journal article supplement (doi:10.5194/tc-2023-41), 2023-03-20
Supplement: Supplementary file [file tc-2023-41-AC1-supplement.pdf]

## General response

We thank the editor Kang Yang for obtaining two valuable reviews and Sam Herreid and the anonymous reviewer for their thorough and constructive comments on our manuscript. On the following pages, we address the reviewers' comments point by point. The reviewers' comments are highlighted in grey. We hope that our responses will qualify us to submit a revised version of the manuscript.

## Response to Referee Comment 1 (RC1)

The article “A low-cost and open-source approach for supraglacial debris thickness mapping using UAV-based infrared thermography” by Messmer and Groos provides an approach to bypass proprietary software to derive accurate surface temperature measurements and solve for debris thickness. The field experiment was thoughtfully set up and the article was a pleasure to read. It goes slightly against the title that the bulk of the analysis was conducted on data processed with proprietary software. This paper is an addition to a growing set of similar papers (mostly well cited within) which support the underlying premise of a coupled signal between surface temperature and debris thickness. This study, however, conveniently avoids the trickier aspects of this line of research by limiting the study site to a location where debris cover is generally thin, <15 cm, where the signal is expected to be strong. The spatial domain of these similar papers is also seemingly stuck to a small swath of a small glacier. Here, the authors put forth some good suggestions on how to break out of this limited domain in a UAV context, but they do not explore them. To further focus the paper, I think the discussion section could be shortened / organized with more subheaders. I also think it would improve the impact of the paper to add a specific discussion section on scaling the method and method repeatability. The in-line comments below are mostly minor.

Thanks for the detailed and constructive review. Following the suggestions above, we have made the following basic changes to the manuscript:

- 1) For the sake of consistency, we performed all processing steps with open-source software and used the results from the proprietary software only for comparison.
- 2) We restructured and organised the discussion using subheaders.
- 3) We added a discussion section on the scaling and repeatability of the method.
- 4) We performed a simple sensitivity analysis of the inverse surface energy balance model (as suggested by the other reviewer, see NEW Fig. 13).

Considering the complexity of accurate UAV-based thermal imaging in the mountains and high-resolution supraglacial debris-thickness mapping, we think it is reasonable to choose a simple setup for a proof-of-concept study. We have managed to extend the survey area considerably in a follow-up experiment and elaborate now in more detail on the scaling of the method in the revised discussion.

We do not agree that detecting thicker debris (i.e. >50 cm) should be the benchmark for a debris

|                                                                                                                                                                                                                                                                                                                                                                                                                                                                                                                                                                                                                                                                                                                                           |
|-------------------------------------------------------------------------------------------------------------------------------------------------------------------------------------------------------------------------------------------------------------------------------------------------------------------------------------------------------------------------------------------------------------------------------------------------------------------------------------------------------------------------------------------------------------------------------------------------------------------------------------------------------------------------------------------------------------------------------------------|
| <p>thickness mapping technique. First, relative thin debris (i.e. &lt;15 cm) predominates on most glaciers and accounts usually for more than 50 % of the total debris-covered area (see Rounce et al., 2021; McCarthy et al., 2022). Second, the melt rate asymptotically approaches a low rate of melt when the debris becomes thicker than ~50 cm (Østrem, 1959; Evatt et al., 2015). While we generally agree that the suitability of the presented methodology needs to be demonstrated for debris thicker than 15 cm in a follow-up study, we think that at least in the context of modelling the smb and evolution of debris-covered glaciers, larger mapping uncertainties in the thicker debris-covered areas are tolerable.</p> |
| <p>Abstract</p> <p>L4: Perhaps less accurate and lower resolution, but it seems a little remiss to not mention Rounce et al., 2021 re: a global map of debris cover.</p>                                                                                                                                                                                                                                                                                                                                                                                                                                                                                                                                                                  |
| <p>We refer to the global debris thickness map of Rounce et al. (2021) at various sections in the text. Here we merely emphasise that there is a global lack of in-situ debris thickness measurements and observations on small-scale variations in debris thickness and sub-debris ice melt rates, leading to considerable uncertainties in the modelling of debris-covered glaciers. The summarising table S1 of Rounce et al. (2021) supports our statement that (published) in-situ measurements of debris thickness and sub-debris ice melt rates are rare (limited to less than 50 glaciers worldwide).</p>                                                                                                                         |
| <p>L5: Maybe it's "describe" the customization of a low cost UAV and "present" a complete open source..</p>                                                                                                                                                                                                                                                                                                                                                                                                                                                                                                                                                                                                                               |
| <p>modified</p>                                                                                                                                                                                                                                                                                                                                                                                                                                                                                                                                                                                                                                                                                                                           |
| <p>L8: Is it still raw though? I assume during the SfM step there was some statistical resampling. I'm fine if you still call it raw, but to me that is strictly the values of the individual radiometric images.</p>                                                                                                                                                                                                                                                                                                                                                                                                                                                                                                                     |
| <p>This is a nuance, but we agree and replaced "raw thermal" by "radiometric" throughout the text</p>                                                                                                                                                                                                                                                                                                                                                                                                                                                                                                                                                                                                                                     |
| <p>L9: provided the dt spanning the set of images is reasonably low. I'm sure you say this in the text.</p>                                                                                                                                                                                                                                                                                                                                                                                                                                                                                                                                                                                                                               |
| <p>This sentence only states that distinct surface temperature variations were found across the surveyed debris-covered area. The relationship between dt and Ts is not meant here. We revised the sentence: "The thermal orthophoto reveals distinct spatial variations in surface temperature across the surveyed debris-covered area."</p>                                                                                                                                                                                                                                                                                                                                                                                             |
| <p>L13: using which method, empirical or inverse EB? Or both?</p>                                                                                                                                                                                                                                                                                                                                                                                                                                                                                                                                                                                                                                                                         |
| <p>Revised: "...can be mapped with high accuracy using an empirical or physical model."</p>                                                                                                                                                                                                                                                                                                                                                                                                                                                                                                                                                                                                                                               |
| <p>L15: is this still for a 0-15 cm class? Or for the whole DC area?</p>                                                                                                                                                                                                                                                                                                                                                                                                                                                                                                                                                                                                                                                                  |
| <p>Debris thicknesses above 15 cm are very rare or absent on the Kanderfirn. We therefore assume that the RMSE of 1.3 cm (updated using the results from the open-source pipeline) calculated as the difference between modelled and observed debris thicknesses is representative for the entire debris-covered area.</p>                                                                                                                                                                                                                                                                                                                                                                                                                |

L17: “paves the way” Does it? I’m not sure when we’ll have regional, not to mention glacier-wide, UAV coverage and moving up to fixed wing or helicopter increases the cost by quite a bit.

Yes, we are convinced that the approach presented here and in other publications (Bisset et al., 2022; Gök et al., 2022) paves the way for comprehensive debris thickness mapping (at least of mountain glaciers, maybe not of large debris-covered outlet glaciers) with UAVs in the order of a couple of square kilometres (we explicitly do not refer to regional attempts), although of course several practical and methodological challenges (related inter alia to spatio-temporal variations in the meteorological conditions and debris properties) are involved. Current low-cost fixed-wing or hybrid UAVs are already capable of surveying extensive areas in glacierised environments (e.g. Juvet et al., 2019: <https://doi.org/10.3389/feart.2019.00206>). We elaborate more on the scaling of this approach in the revised discussion.

Revised sentence: “The presented approach paves the way for comprehensive high-resolution supraglacial debris thickness mapping and opens up new opportunities for more accurate monitoring and modelling of debris-covered glaciers.”

#### Introduction

L44: Rounce et al., 2023 seems to temper this urgency, at least in terms of global sea level predictions. “The inclusion of debris thus delays mass loss over the century especially at local scales but has little impact on sea level rise and the number of glaciers lost by 2100.” Regionally, and for addressing problems on shorter timescales, the urgency seems to remain warranted.

We do not refer to sea level rise here. We appreciate the work of Rounce and colleagues, but one might question how reliable the global map and simulations are with respect to the properties and evolution of debris-covered glaciers in a certain region. Bisset et al. (2022) indicate that the global debris thickness map of Rounce et al. (2021) derived from satellite data might overestimate the debris thickness (at least for individual glaciers), with considerable impacts on the modelled sub-debris melt rates. As the meltwater from debris-covered glaciers is an important fresh water source in different regions, we think the addressed urgency regarding accurate information on debris thickness distribution is warranted.

L53: Consider saying more about the low accuracy since this is key motivation for finescale work such as this. You can more explicitly constrain “low accuracy” with repeatability arguments and the often stated ~0.5 m detection limit. From Rounce et al. 2021, we now know where we can anticipate this limit to be met.

We revised the section as follows: “However, satellite remote sensing has the drawback that the acquisition time, viewing angle and atmospheric conditions cannot be controlled by the end-user and might not be in favour of debris-thickness mapping (e.g. Herreid, 2021). Debris thickness maps based on satellite remote sensing data usually capture general debris thickness patterns in the ablation zone, but cannot resolve the small-scale debris thickness variability and the presence of melt hotspots such as supraglacial ice cliffs and ponds due to their relatively coarse spatial resolution. Since the relationship between debris thickness and sub-debris ice melt is non-linear (Østrem, 1959) and melt spots are not resolved, the mean debris thickness per pixel derived from relatively coarse satellite data seems not well suited to simulate sub-debris ice melt rates.”

L55: Higher resolution mapping techniques are required to do what? Brute force solve the problem with e.g. aerial surveys, or inform satellite based methodology either with sensors in orbit today or wait for civilian satellite surface temperature data to become higher resolution?

As we outline before, the mean debris thickness per pixel derived from relatively coarse satellite data seems not well suited for simulating sub-debris ice melt rates as the small-scale debris-thickness variability and melt hot spots such as cliffs and ponds are not resolved. So if we aim to quantify/simulate the ablation and meltwater contribution of debris-covered glaciers in a more accurate and robust manner (for example in the context of local climate adaptation strategies or water management), high-resolution debris-thickness mapping techniques are required. We added a section in the discussion to outline how in-situ, UAV and satellite data might be combined in the future for supraglacial debris thickness mapping on larger scales.

L59: See also:

Gök, Deniz Tobias, Dirk Scherler, and Leif Stefan Anderson. "High-resolution debris-cover mapping using UAV-derived thermal imagery: limits and opportunities." *The Cryosphere* 17.3 (2023): 1165-1184.

Aubry-Wake, Caroline, et al. "Using ground-based thermal imagery to estimate debris thickness over glacial ice: fieldwork considerations to improve the effectiveness." *Journal of Glaciology* 69.274 (2023): 353-369.

We quote Gök et al. (2022) a few sentences further below. Thanks for the hint, we were not aware of the latest publication of Aubry-Wake et al. (2023). The paper is now quoted.

L61: The nadir camera angle is without a doubt a benefit, and a UAV can capture a wider swath of a glacier. But still, the narrow swaths of high resolution thermal data presented here and in all other similar studies I have seen, the spatial coverage is not operative for studies beyond proof of concept. Further, there are radiometric resolution trade-offs between a heavy ground based camera and those that meet the payload of a UAV. I'm not making an argument for more ground based studies, I'm just saying proof of concept studies might benefit from the better (heavier) sensors and the spatial gains from today's UAVs are not orders of magnitude better.

We fully agree that the thermal orthophoto presented in this study is not orders of magnitude larger than the area that can be surveyed with ground-based infrared thermography. However, we think that a small area is reasonable for a proof of concept and the presentation of a complex processing pipeline. The challenges related to the thermal imaging of larger areas with (fixed-wing) UAVs is going to be addressed in a follow-up paper. However, the general feasibility of UAV-based thermal imaging of larger areas has already been proven in previous studies... (e.g. Kraaijenbrink et al., 2018).

L66 Or hinting at its futility? For a method to be robust, the cannon of similar papers will need to all start converging on good news and repeatability or the general concept should probably be sidelined.

Mapping supraglacial debris with UAVs is tricky (both from a practical and physical point of view), but this study and the studies of Bisset et al. (2022) and Gök et al. (2022) demonstrate that

|                                                                                                                                                                                                                                                                                                                                                                                                                                                                                                                                                                                                                                                                                                                                                                                                                                                                                                                            |
|----------------------------------------------------------------------------------------------------------------------------------------------------------------------------------------------------------------------------------------------------------------------------------------------------------------------------------------------------------------------------------------------------------------------------------------------------------------------------------------------------------------------------------------------------------------------------------------------------------------------------------------------------------------------------------------------------------------------------------------------------------------------------------------------------------------------------------------------------------------------------------------------------------------------------|
| it is feasible in principle. We do not understand why a new technique should not be further developed or even sidelined simply because of technical issues reported in a single study.                                                                                                                                                                                                                                                                                                                                                                                                                                                                                                                                                                                                                                                                                                                                     |
| L69: I assume it would work on thermal imagery acquired by any means?                                                                                                                                                                                                                                                                                                                                                                                                                                                                                                                                                                                                                                                                                                                                                                                                                                                      |
| That's true. Modified.                                                                                                                                                                                                                                                                                                                                                                                                                                                                                                                                                                                                                                                                                                                                                                                                                                                                                                     |
| L73: debris [surface] temperature.                                                                                                                                                                                                                                                                                                                                                                                                                                                                                                                                                                                                                                                                                                                                                                                                                                                                                         |
| Debris temperature and not debris surface temperature is indeed meant here.                                                                                                                                                                                                                                                                                                                                                                                                                                                                                                                                                                                                                                                                                                                                                                                                                                                |
| Study Area                                                                                                                                                                                                                                                                                                                                                                                                                                                                                                                                                                                                                                                                                                                                                                                                                                                                                                                 |
| L87: The debris-covered area of the Kanderfirn is already very small, on a bigger debris covered glacier, say, the terminus of Bering Glacier in Alaska as an extreme, how would you decide where to survey? Is there any path for scalability with this method?                                                                                                                                                                                                                                                                                                                                                                                                                                                                                                                                                                                                                                                           |
| This is an interesting question. While high-endurance UAVs might be able to survey large areas such as the Bering Glacier in Alaska and survey its surface temperature in the future, one might argue that airborne or helicopter-borne missions would be more suitable. Independent of the vehicle, accounting for the varying atmospheric conditions and debris properties across such a large area remains a big challenge. To assess the small-scale variability of debris thickness and quantify its impact on glacial ablation of such large glaciers, UAV-based thermal imaging at a limited number of sites along the flowline and perpendicular to the flowline might be an option. The created high-resolution thermal orthophotos and debris thickness maps might then serve as a reference/basis for the validation, calibration or downscaling of glacier-wide debris thickness maps based on satellite data. |
| Data and Methods                                                                                                                                                                                                                                                                                                                                                                                                                                                                                                                                                                                                                                                                                                                                                                                                                                                                                                           |
| L117: Recommended in the literature or from this study?                                                                                                                                                                                                                                                                                                                                                                                                                                                                                                                                                                                                                                                                                                                                                                                                                                                                    |
| Recommended in the literature. Sentence was modified accordingly: "...a lateral image overlap of at least 60 % is common in UAV photogrammetry (e.g. Kraaijenbrink et al. 2018; Juvet et al., 2019)".                                                                                                                                                                                                                                                                                                                                                                                                                                                                                                                                                                                                                                                                                                                      |
| Table 1: The smaller TIR area surveyed from the same flight must mean that the overlap was less than for the visible imagery? This difference is due to the view angle? Is the 75% from L118 for RGB or TIR?                                                                                                                                                                                                                                                                                                                                                                                                                                                                                                                                                                                                                                                                                                               |
| This is true. The lateral overlap of the TIR imagery was 75 %, while that of the RGB imagery was even larger. We modified the sentence accordingly: "...resulting in a lateral image overlap of 75~\% for the TIR imagery and even more for the RGB imagery."                                                                                                                                                                                                                                                                                                                                                                                                                                                                                                                                                                                                                                                              |
| L139: Literally random, as in picked by an algorithm before going into the field, or just random sampling while you were in the field?                                                                                                                                                                                                                                                                                                                                                                                                                                                                                                                                                                                                                                                                                                                                                                                     |
| The sentence was modified: "...that were randomly distributed across the survey area while being in the field."                                                                                                                                                                                                                                                                                                                                                                                                                                                                                                                                                                                                                                                                                                                                                                                                            |

L148: I'm not sure if it was the correct decision to put the temperature loggers under a rock to shield it from direct radiation since the thermal camera will be measuring the skin temperature and thus include that very warm signal. It's not unusual to measure 30 degree debris surface temperature on a cool but sunny summer day (as you know from your Fig. 10). It helps a little bit that it was slightly overcast (L113), Herreid, 2021 found overcast conditions to be preferable for TIR / debris thickness / sub-debris melt measurements. Studies like this one that look at a debris cover internal temperature profile along with contact thermistor and TIR surface temperature measurements show smooth and predictable diurnal signals just below the surface and lower (below your shale stone) and more chaotic signals for both TIR and contact thermistors at the very surface (chaotic as a function of clouds passing). Both have the scientific uses, I think in your case the skin measurement is correct, but what you collected should still be close.

We shifted the essential sentence from the Results section here: "Since the tiny temperature loggers recorded the debris temperature at shallow depths and the TIR camera mounted on the UAV measured the skin temperature of the debris layer, the in situ measurements and mapped surface temperatures cannot be expected to match exactly. However, a cross-comparison makes it possible to detect a potential warm or cold bias in the camera and assess the plausibility of the mapped debris surface temperature." We did not place the loggers at the surface of the debris layer as their metal housing might have heated up considerably when exposed to direct solar radiation and therefore might record unusually high temperatures that are useless for any kind of comparison.

L150: If you're comparing a ground point measurement to a single thermal pixel at this location and the thermal pixel has a resolution of centimeters, it might be good to take a mean surface temp around the location or move the ribbon off a set distance since it will have a different emissivity to the surrounding rock.

That is true. We did this. However, the procedure is described in a later section (3.6.5) of the manuscript. We therefore included a reference to the respective section.

L151: How long did you leave the sensors running before the survey? At the surface it should be pretty quick, but the sensors need to become isothermal with their environment.

We added this information: "The loggers were set to record temperature at an interval of 10 minutes and were running for about an hour before the survey so that they could become isothermal with their environment."

L159: A few km in the mountains can make a lot of difference, e.g. RH in Table 2. Your final calculations might not be so different with a local sensor, but I think it would be following best practices for a small scale proof of concept study to at least collect local air temperature and RH measurements.

We fully agree that on-site measurements would be beneficial and best practice. Unfortunately, we neither had access to nor funding for the installation of an automatic weather station on the glacier. The experiment was conducted within a student's project without any additional funding.

Fig 4. Should "Ice-snow mask" also include debris (L170)? Was this a manual or automated step?

|                                                                                                                                                                                                                                                                                                                                                                                                                                                                                                                                                                                                                                                                         |
|-------------------------------------------------------------------------------------------------------------------------------------------------------------------------------------------------------------------------------------------------------------------------------------------------------------------------------------------------------------------------------------------------------------------------------------------------------------------------------------------------------------------------------------------------------------------------------------------------------------------------------------------------------------------------|
| Thanks for the hint. We updated Fig. 4: “Ice/snow/debris mask”                                                                                                                                                                                                                                                                                                                                                                                                                                                                                                                                                                                                          |
| Fig 4. It’s a little confusing if the SfM-MVS steps are open-source or not? L200-214 makes it sound like you used proprietary software but found open source alternatives but didn’t find them suitable for your study? I can completely understand how these decisions happen and end up a bit confusing in text form. However, if there is a simple notebook workflow from start to finish, as Fig. 4 suggests, it would be most clear if this was the workflow used, and then you could have a standalone validation section with comparisons to common proprietary software packages.                                                                               |
| The inconsistency originates from the history of the workflow development. We failed at the beginning to produce accurate and suitable thermal orthophotos with the open-source pipeline. Anyway, we fully agree and revised the manuscript accordingly. We now present the complete open-source pipeline and have a stand alone validation section using the results from the processing with the proprietary software package.                                                                                                                                                                                                                                        |
| L198: I don’t actually see this step in Fig 4. I guess you are referencing only the open-source pipeline but it reads like the validation step is there.                                                                                                                                                                                                                                                                                                                                                                                                                                                                                                                |
| Yes, we are only referencing the open-source pipeline. We revised the sentence to make that clear.                                                                                                                                                                                                                                                                                                                                                                                                                                                                                                                                                                      |
| L198: Already stated in L172                                                                                                                                                                                                                                                                                                                                                                                                                                                                                                                                                                                                                                            |
| We deleted the sentence.                                                                                                                                                                                                                                                                                                                                                                                                                                                                                                                                                                                                                                                |
| L240: It’s not exactly clear to me where the coefficients came from, from the FLIR algorithm or from a different study or from a post processing step, in which case there should be many for each raw image or only one set from the orthoimage?                                                                                                                                                                                                                                                                                                                                                                                                                       |
| We added the information: “An overview of the different atmospheric attenuation constants (provided by FLIR within the metadata) is given in Table...”                                                                                                                                                                                                                                                                                                                                                                                                                                                                                                                  |
| Equation 2, 3: can you give the citation again for these? Is it all Tattersall (2021a)?                                                                                                                                                                                                                                                                                                                                                                                                                                                                                                                                                                                 |
| Yes, it is all Tattersall (2021a). We added the citation to Eqn. 2 and 3.                                                                                                                                                                                                                                                                                                                                                                                                                                                                                                                                                                                               |
| Equation 4: I don’t understand why you take the square of the correction factor?                                                                                                                                                                                                                                                                                                                                                                                                                                                                                                                                                                                        |
| The reason for the square of the correction factor is that two equations have been combined here. We make it clear in the text.                                                                                                                                                                                                                                                                                                                                                                                                                                                                                                                                         |
| L255: I’m not so sure if the GCPs meet the criteria, the motivation for the crinkle is to capture surfaces normal to all different angles, in this case I think you’re getting almost exclusively a signal from the upper atmosphere or overhead clouds which will be quite a bit colder than reflective temperature from, say, a valley wall or nearby moraine. Especially if only extracting a central point. I think this is also somewhat of a localized measurement problem, e.g. if someone is having a bonfire just off frame, that heat will “bleed” into neighboring pixels. Do you know what, at your scale, the source of this correction is accounting for? |
| We revised the section: “The thermal GCPs served as a simple diffuse reflector. Hence, the                                                                                                                                                                                                                                                                                                                                                                                                                                                                                                                                                                              |

|                                                                                                                                                                                                                                                                                                                                                                                                                                                                                                                                                                                                                                                                                                                                                                                                                                                                                                                                 |
|---------------------------------------------------------------------------------------------------------------------------------------------------------------------------------------------------------------------------------------------------------------------------------------------------------------------------------------------------------------------------------------------------------------------------------------------------------------------------------------------------------------------------------------------------------------------------------------------------------------------------------------------------------------------------------------------------------------------------------------------------------------------------------------------------------------------------------------------------------------------------------------------------------------------------------|
| <p>temperature of each thermal GCP was extracted from the thermal orthophoto calculated as outlined in this section but with emissivity set to 1.” It is very difficult to assess the source of the reflected signal detected at the GCPs. Theoretically, longwave radiation reflected by the south-face of the Blüemlisalp, located to the north of the debris-covered area, should be partly reflected into the direction of the camera, but we agree that most of the detected signal probably comes from the cirrus clouds above. Anyway, compared to other uncertainties in the method, the bias related to the reflected apparent temperature is negligible. Varying the reflected apparent temperature of <math>-6.8\text{ }^{\circ}\text{C}</math> by <math>\pm 3.2\text{ }^{\circ}\text{C}</math> (standard deviation) would change the surface temperature by only <math>\pm 0.15\text{ }^{\circ}\text{C}</math>.</p> |
| <p>Table 3: Why do you differentiate between snow and ice if you apply the same emissivity?</p>                                                                                                                                                                                                                                                                                                                                                                                                                                                                                                                                                                                                                                                                                                                                                                                                                                 |
| <p>Because the northern part of the study area includes an avalanche cone which was covered by fresh snow from a couple of days before the survey (see Fig. 8).</p>                                                                                                                                                                                                                                                                                                                                                                                                                                                                                                                                                                                                                                                                                                                                                             |
| <p>L282: Was there snow in your study area? Last year’s or fresh?</p>                                                                                                                                                                                                                                                                                                                                                                                                                                                                                                                                                                                                                                                                                                                                                                                                                                                           |
| <p>See comment before.</p>                                                                                                                                                                                                                                                                                                                                                                                                                                                                                                                                                                                                                                                                                                                                                                                                                                                                                                      |
| <p>L302-308: I think it’s fine to have the context here but could move to results or discussion.</p>                                                                                                                                                                                                                                                                                                                                                                                                                                                                                                                                                                                                                                                                                                                                                                                                                            |
| <p>Moved to the discussion.</p>                                                                                                                                                                                                                                                                                                                                                                                                                                                                                                                                                                                                                                                                                                                                                                                                                                                                                                 |
| <p>L310: “can be”, but within some well known limitations. Time of day, e.g. if all surfaces go isothermal at night, or signal decoupling from thick debris.</p>                                                                                                                                                                                                                                                                                                                                                                                                                                                                                                                                                                                                                                                                                                                                                                |
| <p>We revised the sentence as follows: “A supraglacial debris thickness map can be derived from a corrected thermal orthophoto for areas with a debris thickness of less than <math>\sim 0.5\text{ m}</math> using either a local empirical relationship between debris thickness and surface temperature or an inverted glacier surface energy balance model, provided that the thermal imagery were collected at a time when the debris surface temperature was sufficiently heterogeneous (e.g. Mihalcea et al., 2008a, b; Foster et al., 2012; Juen et al., 2014; Rounce and McKinney, 2014; Groos et al., 2017; Rounce et al., 2018, 2021).</p>                                                                                                                                                                                                                                                                            |
| <p>L316: Add citation to statement.</p>                                                                                                                                                                                                                                                                                                                                                                                                                                                                                                                                                                                                                                                                                                                                                                                                                                                                                         |
| <p>We added Mihalcea et al. (2008a).</p>                                                                                                                                                                                                                                                                                                                                                                                                                                                                                                                                                                                                                                                                                                                                                                                                                                                                                        |
| <p>Figure 5: Add <math>n=</math> to each class; maybe stylistic, but I would continue the curve through the origin since <math>0\text{ h}_d</math> will theoretically pass <math>0\text{ }^{\circ}\text{C}</math>.</p>                                                                                                                                                                                                                                                                                                                                                                                                                                                                                                                                                                                                                                                                                                          |
| <p>The number of training and validation measurements was included.<br/>We do not continue the curve through the origin as an empirical model is not valid beyond the observations. Moreover, the empirical model would also work for surface temperature measurements with a warm or cold bias and therefore <math>0\text{ h}_d</math> does not necessarily pass <math>0\text{ }^{\circ}\text{C}</math>. This is only true for a physical model.</p>                                                                                                                                                                                                                                                                                                                                                                                                                                                                           |
| <p>L327: Probably best stated with results, putting them into context.</p>                                                                                                                                                                                                                                                                                                                                                                                                                                                                                                                                                                                                                                                                                                                                                                                                                                                      |



|                                                                                                                                                                                                                                                                                                                                                                                                                                                                                                                                                                                                                                                                                                                                                                                                                                                                                                                                                                                                                                                                                                                                                 |
|-------------------------------------------------------------------------------------------------------------------------------------------------------------------------------------------------------------------------------------------------------------------------------------------------------------------------------------------------------------------------------------------------------------------------------------------------------------------------------------------------------------------------------------------------------------------------------------------------------------------------------------------------------------------------------------------------------------------------------------------------------------------------------------------------------------------------------------------------------------------------------------------------------------------------------------------------------------------------------------------------------------------------------------------------------------------------------------------------------------------------------------------------|
| The calculated uncertainties were shifted to the Results.                                                                                                                                                                                                                                                                                                                                                                                                                                                                                                                                                                                                                                                                                                                                                                                                                                                                                                                                                                                                                                                                                       |
| L355: Thermal diffusivity is at least straightforward to solve for from field data and common in debris cover research. I thought the idea behind your page worth of equations is that there isn't a tuning parameter? Maybe say here that you limited k to realistic values. Unless I'm misreading the purpose of Table 5, add the range/set of values of k rather than just one. Is 1 the best performing that you tried? What did Evatt et al., 2015 use? What metric did you optimize on?                                                                                                                                                                                                                                                                                                                                                                                                                                                                                                                                                                                                                                                   |
| <p>If the debris layer is thin, it is rather difficult to accurately determine the thermal diffusivity as the depth between the loggers is small and measurement uncertainties therefore have a larger impact. However, in a follow-up study, we aim to place loggers at multiple depths in the area where the debris is thickest to get an idea of the thermal diffusivity and conductivity.</p> <p>Since several of the input parameters were estimated, we had to calibrate the model. We updated this section and included a sensitivity analysis to address the uncertainty related to different input parameters concerning the meteorological conditions and debris properties (see NEW Fig. 13). As the effective thermal conductivity is the parameter that has the largest impact on thin debris in the inverse surface energy balance model (&lt;15 cm), we used it as a tuning parameter. We limited the range of k to realistic values (0.5-1.5 W m<sup>-1</sup> K<sup>-1</sup>) and calibrated it against the observed debris thickness measurements. In Evatt et al. (2015), k equals 0.585 W m<sup>-1</sup> K<sup>-1</sup>.</p> |
| <p>Results</p> <p>L360: Debris thickness measurements are always a little subjective depending on where you measure. Somewhere, maybe study area section, could you say some qualitative observations of your measurements e.g. in debris less than 1 cm there were fines that still covered the surface or single clasts at the measured debris thickness and bare ice visible between clasts. To those familiar with these field measurements we'll know if this has the potential to have a higher melt rate than bare ice (in the case of the fines) or about the same as bare ice (if it's just stones doing a small scale version of the ice pedestal process).</p>                                                                                                                                                                                                                                                                                                                                                                                                                                                                       |
| We added a short sentence in the subsection 3.3.1 (In situ measurements – debris thickness):<br>“Only areas were sampled that were completely covered by debris or fine material.”                                                                                                                                                                                                                                                                                                                                                                                                                                                                                                                                                                                                                                                                                                                                                                                                                                                                                                                                                              |
| L360: Maybe “in diameter”, of course it's clear as it is, but sounds a little funny.                                                                                                                                                                                                                                                                                                                                                                                                                                                                                                                                                                                                                                                                                                                                                                                                                                                                                                                                                                                                                                                            |
| Revised: “The thickness of the supraglacial debris layer measured manually at 43 points on the Kanderfirn (Fig. 1) ranges from less than 1 cm to about 13 cm (Table A1).”                                                                                                                                                                                                                                                                                                                                                                                                                                                                                                                                                                                                                                                                                                                                                                                                                                                                                                                                                                       |
| L362: [were] not measured or mapped.                                                                                                                                                                                                                                                                                                                                                                                                                                                                                                                                                                                                                                                                                                                                                                                                                                                                                                                                                                                                                                                                                                            |
| revised                                                                                                                                                                                                                                                                                                                                                                                                                                                                                                                                                                                                                                                                                                                                                                                                                                                                                                                                                                                                                                                                                                                                         |
| Figure 6: I think “modeled” not “mapped” on x-axis                                                                                                                                                                                                                                                                                                                                                                                                                                                                                                                                                                                                                                                                                                                                                                                                                                                                                                                                                                                                                                                                                              |
| changed                                                                                                                                                                                                                                                                                                                                                                                                                                                                                                                                                                                                                                                                                                                                                                                                                                                                                                                                                                                                                                                                                                                                         |
| Figure 6: The problem with Fig. 6 is that we look to measured for what the distribution should be, but actually the other two are probably more “true” because they are more inclusive. I think you                                                                                                                                                                                                                                                                                                                                                                                                                                                                                                                                                                                                                                                                                                                                                                                                                                                                                                                                             |

|                                                                                                                                                                                                                                                                                                                                                                                                            |
|------------------------------------------------------------------------------------------------------------------------------------------------------------------------------------------------------------------------------------------------------------------------------------------------------------------------------------------------------------------------------------------------------------|
| need to add two more: emp and phy with only intersecting points to measured.                                                                                                                                                                                                                                                                                                                               |
| As suggested, we added two more violin plots: emp and phy with only intersecting points to measured.                                                                                                                                                                                                                                                                                                       |
| Figure 7: Same comment as above but compounded by being fundamentally different quantities. Still nice that the shape is similar, but are any of your readers skeptical about the physics behind a thermal image? I'm not 100% sure I see the point of this figure. I think there is no good reason to leave the GCP points in the fig.                                                                    |
| As this is a proof-of-concept study, we think it is reasonable to provide a plot that shows the distribution of the mapped surface temperature values. We assume the readers do not question the physics behind a thermal image, but they might be sceptical about the absolute accuracy. The distribution peak close to 0° shows that the measurements are plausible and that there is no major bias.     |
| Figure 8: This figure seems mostly unnecessary and could be merged with Fig. 1. Maybe others feel differently, but I don't get any new information from seeing a raw DSM, the glacier outline is a pretty unrecognizable shape, and I think most specialists reading the paper will take you at your word about high resolution data resolving boulders, debris and ice cliffs/crevasses.                  |
| We partly understand your point, but we think this figure helps to better understand the general setting and spatial debris surface temperature and thickness variations. As the other reviewer was wondering about the slope and aspect of the surveyed area, we added two additional maps.                                                                                                               |
| L376-385: Move to Study Area section                                                                                                                                                                                                                                                                                                                                                                       |
| We again partly understand your point, but we prefer to keep the section here (same argument as in the previous comment).                                                                                                                                                                                                                                                                                  |
| L384: give fig ref with labeled "M"                                                                                                                                                                                                                                                                                                                                                                        |
| Fig. 8 is now referenced                                                                                                                                                                                                                                                                                                                                                                                   |
| L384: I have never heard of supraglacial moraines having a lower tail. I think what you mean is a medial moraine structure is crosscut (maybe add: and dispersed) by surface water flowing orthogonal to ice flow. Semantically, all of the rock in your study area is supraglacial moraine.                                                                                                               |
| Thanks, that is exactly what we wanted to say. We adopted your sentence: "In the south-eastern corner of the surveyed area, the lower part of a medial moraine (labelled with "M" in Fig. 8) that is crosscut and dispersed by surface water flowing orthogonal to ice flow and that has become wider over the last years can be seen (Fig. 8; for a better overview see Fig. 11 in Groos et al., 2019)."  |
| L389-390: I don't recall this being a research question raised in the introduction, and I'm not sure if it needs much attention. I would say a network of field based Ts measurements to evaluate the signal of a medium resolution satellite thermal pixel addresses a scientific need, but here I think I trust your drone images to measure Ts more than contact thermistors below the surface. I would |

|                                                                                                                                                                                                                                                                                                                   |
|-------------------------------------------------------------------------------------------------------------------------------------------------------------------------------------------------------------------------------------------------------------------------------------------------------------------|
| flip the axes of Fig 9 to say you can use T below the rock to approximate Ts :)                                                                                                                                                                                                                                   |
| As stated before, the uncertainty of the surface measurements as provided by the manufacturer is $\pm 5^\circ\text{C}$ or 5 % of the reading. We simply conducted this cross-comparison to be sure that the thermal measurements are plausible and that the camera does not exhibit a distinct cold or warm bias. |
| To the best of our knowledge, the independent (explaining) variable is plotted on the x-axis and the dependent variable on the y-axis. So if we use “T below the rock [debris temperature]” to approximate “Ts [surface temperature]”, there is no need to flip the axes.                                         |
| L399: “More interesting” but in a supplemental figure :) (I’m not saying change it)                                                                                                                                                                                                                               |
| “More interesting” with respect to the small-scale deviations in the same supplemental figure, not “more interesting” than the surface temperature map. We referenced Fig. B1 earlier to make that clear.                                                                                                         |
| L403: It’s important and good that you used both proprietary and open source software, but slightly concerning that you preference the proprietary while open source is a main contribution of this work.                                                                                                         |
| Agreed! Please refer to our response further above. We revised the manuscript and now present all results from the open-source pipeline while the maps obtained with the proprietary software are only used for comparison.                                                                                       |
| Figure 10: I thought emissivity was segmented for the different surfaces?                                                                                                                                                                                                                                         |
| No, it was not segmented in the original version. We now created a surface type raster with the classes ice/snow and debris, and assigned the respective emissivities to create one consistent surface temperature map.                                                                                           |
| Figure 10: Is there a mechanism for sub freezing temperatures or is that a processing error?                                                                                                                                                                                                                      |
| We assume that all snow and ice surface were close to the melting point. So sub-freezing temperatures are likely a signal error.                                                                                                                                                                                  |
| L404: Notably the snow patch is lower than 0C and what looks like depressions near the bare ice. Any idea if this is signal or error? Maybe places to suggest putting T ground control for future studies?                                                                                                        |
| The lowest surface temperatures were found on the snow patch. However, one should keep in mind that the number of available (thermal) images at the edge of the orthophoto is always reduced. Measurements along the margin are therefore generally less reliable.                                                |
| L405: I think more technically it is atmospheric temperature not surface temperature. The actual surface temperature of the aluminum is near isothermal with the ground.                                                                                                                                          |
| The comment is obsolete as we removed the GCPs from the surface temperature map as suggested by the other reviewer and interpolated the area using values from the surrounding                                                                                                                                    |

|                                                                                                                                                                                                                                                                                                                                                                                                                                                                                                                                                                                                                                                                                                                                                                                                                                                                                                                                                                                                                                                                                                                                                                                                                                                                                                                                                                                                                                                                                                                                                                                                                                                                                                                                                                                                                                                                                                                                                                                                                                                                    |
|--------------------------------------------------------------------------------------------------------------------------------------------------------------------------------------------------------------------------------------------------------------------------------------------------------------------------------------------------------------------------------------------------------------------------------------------------------------------------------------------------------------------------------------------------------------------------------------------------------------------------------------------------------------------------------------------------------------------------------------------------------------------------------------------------------------------------------------------------------------------------------------------------------------------------------------------------------------------------------------------------------------------------------------------------------------------------------------------------------------------------------------------------------------------------------------------------------------------------------------------------------------------------------------------------------------------------------------------------------------------------------------------------------------------------------------------------------------------------------------------------------------------------------------------------------------------------------------------------------------------------------------------------------------------------------------------------------------------------------------------------------------------------------------------------------------------------------------------------------------------------------------------------------------------------------------------------------------------------------------------------------------------------------------------------------------------|
| pixels.                                                                                                                                                                                                                                                                                                                                                                                                                                                                                                                                                                                                                                                                                                                                                                                                                                                                                                                                                                                                                                                                                                                                                                                                                                                                                                                                                                                                                                                                                                                                                                                                                                                                                                                                                                                                                                                                                                                                                                                                                                                            |
| L408: What is reporting the average temperature of a random glacier patch for a random time good for? What is a reader learning?                                                                                                                                                                                                                                                                                                                                                                                                                                                                                                                                                                                                                                                                                                                                                                                                                                                                                                                                                                                                                                                                                                                                                                                                                                                                                                                                                                                                                                                                                                                                                                                                                                                                                                                                                                                                                                                                                                                                   |
| We deleted the sentence.                                                                                                                                                                                                                                                                                                                                                                                                                                                                                                                                                                                                                                                                                                                                                                                                                                                                                                                                                                                                                                                                                                                                                                                                                                                                                                                                                                                                                                                                                                                                                                                                                                                                                                                                                                                                                                                                                                                                                                                                                                           |
| Figure 11: Do you think it's a coincidence that these very cold areas are on the edges of the spatial domain? Maybe a surface resampling residual? Although that seems unlikely with such dense data. Camera angle / vignetting? I think that might be a problem with smaller thermal cameras vs bigger handheld ones. Can you look at the actual raw thermal tiles and see if they also have that cold signal? What's tripping me up is the surface stream that seems to go cold warm cold, but there is some cross cutting. Could you do an oblique 3D of this so we can see the gradients? The forcings on the ground should be pretty straight forward, 0C water and protection from incoming solar. The change in color of the rock in Fig. 8 at the bottom makes me think it could be a rock wetness / emissivity difference, not so clear about higher/northern cold spots.                                                                                                                                                                                                                                                                                                                                                                                                                                                                                                                                                                                                                                                                                                                                                                                                                                                                                                                                                                                                                                                                                                                                                                                 |
| We copy the response to the other reviewer here: "We (re)calculated the deviation from the melting point now only for the bare-ice and snow-covered area using the new ice/snow mask (see Fig. 11). We also computed the frequency distribution for the surface temperatures mapped across the bare-ice and snow-covered area (see NEW Fig. 6). The largest deviations of up to $\pm 4$ °C can be indeed observed at the edges. This is not surprising as the number of images available for the processing is smaller here and vignetting effects might therefore be more pronounced. In the central part, non-uniformities within individual images associated with external effects on the camera (ambient air, radiation etc.), are probably averaged out during the photogrammetric processing. The deviation patterns shown in Fig. 11 most likely do not represent real surface temperature variations, but rather originate from an insufficient calibration of non-uniformities in the raw thermal images. We elaborate in more detail on the challenges related to UAV-based thermal imaging in the revised discussion, summarise important operational recommendations and outline possible technical solutions. For example, we highly recommend that future studies relying on accurate absolute surface temperatures deploy a portable and light-weight calibrator (heated shutter) that has recently become available and can increase the accuracy of uncooled microbolometers considerably (see Virtue et al. 2021). For an uncooled microbolometer as the one used in this study and taking into account the complexity of thermal imaging on an alpine glacier, the accuracy seems reasonable. Most of the pixel values in the bare ice and snow-covered area (70 %) are in the range of $\pm 2$ °C. Only 7 % of the pixels deviate by more than $\pm 3$ °C. We added a section in the discussion to elaborate in more detail on the uncertainties in the modelled debris thickness caused by the inaccuracies in the surface temperature map." |
| L419: That's fine to mention the camera detection limit, but there's a difference between random error and a systematic shift. For your empirical relation this is not really relevant but I think the absolute Ts is important for the EB model.                                                                                                                                                                                                                                                                                                                                                                                                                                                                                                                                                                                                                                                                                                                                                                                                                                                                                                                                                                                                                                                                                                                                                                                                                                                                                                                                                                                                                                                                                                                                                                                                                                                                                                                                                                                                                  |
| Yes, accurate absolute Ts is more important for the SEB model than for the empirical model.                                                                                                                                                                                                                                                                                                                                                                                                                                                                                                                                                                                                                                                                                                                                                                                                                                                                                                                                                                                                                                                                                                                                                                                                                                                                                                                                                                                                                                                                                                                                                                                                                                                                                                                                                                                                                                                                                                                                                                        |
| L438: Earlier it was not called a sensitivity experiment, and here it's unclear half way through the                                                                                                                                                                                                                                                                                                                                                                                                                                                                                                                                                                                                                                                                                                                                                                                                                                                                                                                                                                                                                                                                                                                                                                                                                                                                                                                                                                                                                                                                                                                                                                                                                                                                                                                                                                                                                                                                                                                                                               |

|                                                                                                                                                                                                                                                                                                                                                                           |
|---------------------------------------------------------------------------------------------------------------------------------------------------------------------------------------------------------------------------------------------------------------------------------------------------------------------------------------------------------------------------|
| sentence. There's a difference between a sensitivity analysis and model calibration.                                                                                                                                                                                                                                                                                      |
| That is true. We included a sensitivity analysis in the revised manuscript (see NEW Fig. 13).                                                                                                                                                                                                                                                                             |
| L438: Consider subsections between empirical and EB results, it's not clear going straight into k that this is a build for EB results.                                                                                                                                                                                                                                    |
| We did not include additional subsections, but we made the transition from the empirical to the SEB results clearer.                                                                                                                                                                                                                                                      |
| L440: Point to where in Fig 13 we learn the "very sensitive"                                                                                                                                                                                                                                                                                                              |
| See NEW Fig. 13                                                                                                                                                                                                                                                                                                                                                           |
| L440: What does "spread" mean? The RMSE?                                                                                                                                                                                                                                                                                                                                  |
| "spread" was replaced by "RMSE"                                                                                                                                                                                                                                                                                                                                           |
| L451: Nice result. Maybe also speak to repeatability / calibration here if there isn't a more in depth section in the discussion.                                                                                                                                                                                                                                         |
| We come back to the difference between the empirical and SEB model in the discussion.                                                                                                                                                                                                                                                                                     |
| Discussion                                                                                                                                                                                                                                                                                                                                                                |
| L454: I'm not recalling any explicit mention of the cost?                                                                                                                                                                                                                                                                                                                 |
| We included the cost in the section "3.1 Customised low-cost UAV". The deployed DJI Mavic pro costs less than 1,000 EUR, similar to the self-built UAV we use for the annual surveys on the Kanderfirn (see Groos et al. 2019).                                                                                                                                           |
| L459: Trading for an easily acquired time-series.                                                                                                                                                                                                                                                                                                                         |
| Revised: "However, acquiring a continuous time-series as with automatic field-based thermal imaging techniques is difficult. Moreover, other challenges arise from the deployment of UAVs and both terrestrial and aerial thermal images require a proper calibration and validation."                                                                                    |
| L469: I wouldn't say "defacto infeasible", just a problem needing an innovative solution.                                                                                                                                                                                                                                                                                 |
| Revised                                                                                                                                                                                                                                                                                                                                                                   |
| L475: Thermal equilibrium with what? Do you mean a single temperature throughout? Your method itself depends on a thermal gradient within the debris layer.                                                                                                                                                                                                               |
| No, that is not what we meant. We revised the sentence: "The two subsequent thermal UAV surveys on the Kanderfirn were performed in the early afternoon (between 13:51 and 14:40 CEST) as a high spatial heterogeneity in surface temperatures that reflects supraglacial debris thickness variations can be expected around this time of the day (Bisset et al., 2022)." |
| L530: Why unclear? Within constrained confidence limits, the measurement is not much different from any other that is generally collected without redundancy.                                                                                                                                                                                                             |

|                                                                                                                                                                                                                                                                                                                                                                                                                                                                                                                                         |
|-----------------------------------------------------------------------------------------------------------------------------------------------------------------------------------------------------------------------------------------------------------------------------------------------------------------------------------------------------------------------------------------------------------------------------------------------------------------------------------------------------------------------------------------|
| Revised: “In the absence of independent debris (surface) temperature measurements, such as in the study by Gök et al. (2022), possible biases or shifts in the UAV-based debris surface temperature recordings might be overlooked”.                                                                                                                                                                                                                                                                                                    |
| L539-548: This paragraph seems to be repeating established ideas and results, consider cutting.                                                                                                                                                                                                                                                                                                                                                                                                                                         |
| Minimally shortened                                                                                                                                                                                                                                                                                                                                                                                                                                                                                                                     |
| L548: This study is limited to debris thicknesses that are known to be detectable with thermal imagery. I think the key questions for a promising debris thickness mapping technique are centered around thicker debris, so this statement seems too strong to me given the scope of the study. As $T_s$ climbs the upper limb of the Eq in Fig 5, small variations in $T_s$ produce bigger errors in debris thickness. This study, at least the empirical portion, is conveniently distant from the approaching asymptotic behavior.   |
| See general comment at the beginning.<br>Revised sentence: “As the pronounced spatial surface temperature variations are associated with debris thickness variations, the created thermal orthophoto is a promising basis for high-resolution mapping of supraglacial debris thinner than $\sim 50$ cm, which usually accounts for large parts of the total debris-covered area (Rounce et al., 2021; McCarthy et al., 2022)                                                                                                            |
| L555: Why, because it has a slightly more similar shape than the wider emp? Per my earlier comment, I don’t think these plots are directly comparable.                                                                                                                                                                                                                                                                                                                                                                                  |
| Because the debris thickness map of the physical model better represents the very thin debris thicknesses (ca. 0-3 cm) in the debris-covered area in the south-eastern part of the surveyed area, close to the bare ice surface. Moreover, it also simulates debris thicknesses of more than 15 cm, which can be confirmed from our field visit.                                                                                                                                                                                        |
| L591: To be fair, Kanderfirn is a tiny glacier with almost no debris cover. That the global dataset caught it at all seems like a very positive review.                                                                                                                                                                                                                                                                                                                                                                                 |
| From this perspective, yes. We therefore revised the section: “A simple comparison of the high-resolution map and additional field observations from the Kanderfirn with the global debris thickness dataset of Rounce et al. (2021) shows that the global debris mask comprises a quarter of the debris-covered area of the Kanderfirn, although it is relatively small and therefore difficult to detect. However, the modelled debris thicknesses derived from satellite data seem to overestimate considerably the true thickness.” |
| L595-597: Now talking about sub-debris melt seems a little out of place from the bulk discussion of the paper.                                                                                                                                                                                                                                                                                                                                                                                                                          |
| We revised this section. It now mainly focuses on debris thickness mapping and less on sub-debris ice melt rates.                                                                                                                                                                                                                                                                                                                                                                                                                       |
| L597: I think your study domain would cover 6 ASTER thermal pixels. It’s not the most encouraging advice to say this study would have to be repeated maybe 10 times to cover a more traditionally extensive debris cover and evaluate satellite data.                                                                                                                                                                                                                                                                                   |

The area surveyed within this proof-of-concept study is of course far too small for any meaningful evaluation of thermal satellite data. However, with a fixed-wing or tail-sitter UAV, debris-covered areas more than 10 times larger than the one presented here can be surveyed and mapped, and would facilitate a comparison with thermal satellite data. We have successfully installed the radiometric TIR camera on our customised low-cost UAV (see Groos et al. 2019) in the meantime and were able to collect radiometric data of a much larger area.

#### Conclusions

L603: I don't really see any "[paving] the way for glacier-wide high-resolution debris thickness mapping" in this study. The following sentence provides some ideas to overcome the 10 minute drone flight limit, but these are not explored here. The discussion is dismissive of using reanalysis data (Gok et al., 2022) but doesn't put forth an alternative scaling method other than deploying more met stations on glaciers.

We noticed that the scalability and repeatability of the method should be discussed in more detail and, thus, included a specific section on this topic in the discussion. We agree that the complete mapping of large debris-covered outlet glaciers in Alaska or the extensive debris-covered tongues of some glaciers in the Himalaya, Karakoram, Andes etc. is not realistic with the presented methodology, at least not in the near future. We therefore substituted "glacier-wide" by "comprehensive" debris thickness mapping. Because of the following reasons, we are convinced that the presented low-cost and open-source approach paves the way for comprehensive, accurate and high-resolution UAV-based debris thickness mapping:

1. Thermal imaging of larger debris-covered areas is possible with fixed-wing UAVs. We managed in the meantime to install the radiometric TIR camera on our customised low-cost UAV and conduct more extensive surveys. We started to process the data and will present the results in a follow-up paper.
2. Portable and light-weight calibrators that can be attached to a TIR camera to enable consistent thermal measurements and increase the accuracy of absolute temperature recordings are now available (see Virtue et al., 2021) and facilitate more extensive UAV-based thermal imaging.
3. We refrain from using uncorrected global reanalysis data with a resolution of  $0.1^\circ \times 0.1^\circ$  for the processing of thermal UAV-data, but not from the use of regional reanalysis data or gridded observational data that better represent the meteorological conditions in the mountains. We also do not opt for more met stations on glaciers. Instead, we suggest that air temperature, relative humidity and radiation could be measured directly by the UAV during thermal imaging to account for spatial and temporal variations in the meteorological/environmental conditions. During a couple of test flights on the glacier in 2022, we managed to acquire thermal images and some meteorological data with a UAV at the same time.

L607: ODM

Modified

L613: I'm not sure I agree this is the most important next step, these thermal data seem quite good and fairly well constrained. I think effort now needs to be focused on thicker debris,

repeatability, and wider coverage.

We agree that follow-up studies should focus on thicker debris, repeatability and wider coverage. However, temporal and spatial variations in the meteorological conditions that affect the accuracy of the surface temperature measurements become more critical for larger and longer aerial surveys. So the technical and practical developments seem to go hand in hand.

L615: Can you state some statistical measures of performance for the two methods here and in the abstract? It would be useful for the reader to see right away how different the end results are of the two methods.

The performance of both methods, the empirical model and calibrated physical model, is similar. At the location of the in-situ debris thickness measurements, the RMSD of the modelled debris thickness is in the order of 2 cm in both cases. We added this information to the conclusion and abstract.

#### References

Rounce, David R., et al. "Distributed global debris thickness estimates reveal debris significantly impacts glacier mass balance." *Geophysical Research Letters* 48.8 (2021): e2020GL091311.

Rounce, David R., et al. "Global glacier change in the 21st century: Every increase in temperature matters." *Science* 379.6627 (2023): 78-83.
